# Supplementary material for: Complexes of {Mo6I8} with nitrophenolates: synthesis and luminescence
Source: Royal Society of Chemistry journal article supplement (doi:10.1039/c5nj02246k), 2015-11-10
Supplement: c5nj02246k1.pdf [file c5nj02246k1.pdf]

NEW JOURNAL OF CHEMISTRY

**Complexes of {Mo<sub>6</sub>I<sub>8</sub>} with nitrophenolates: synthesis and luminescence**

Maksim A. Mikhailov,<sup>a</sup> Konstantin A. Brylev,<sup>a,b</sup> Alexandr V. Virovets,<sup>a,b</sup> Marsel R. Gallyamov,<sup>a</sup>  
Igor Novozhilov,<sup>a</sup> Maxim N. Sokolov\*<sup>a,b</sup>

<sup>a</sup> *Nikolaev Institute of Inorganic Chemistry, Siberian Branch of the Russian Academy of Sciences, Novosibirsk 630090, Russia.*

<sup>b</sup> *Novosibirsk State University, Novosibirsk 630090, Russia.*

**Supporting information**

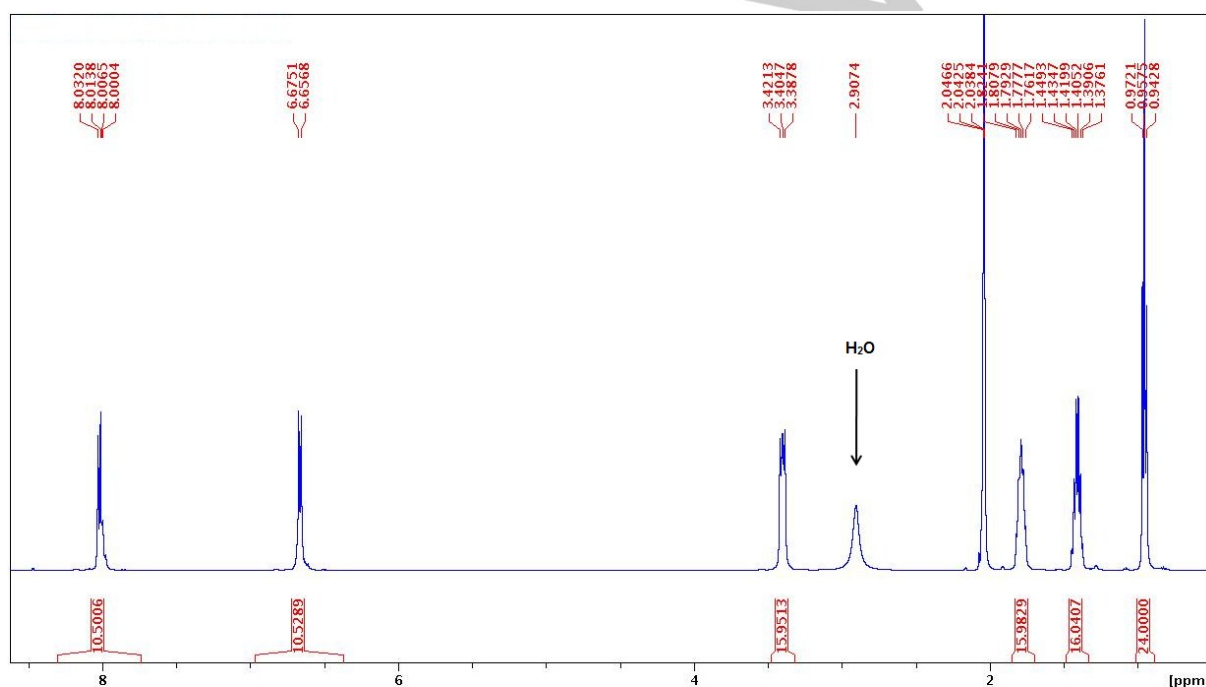

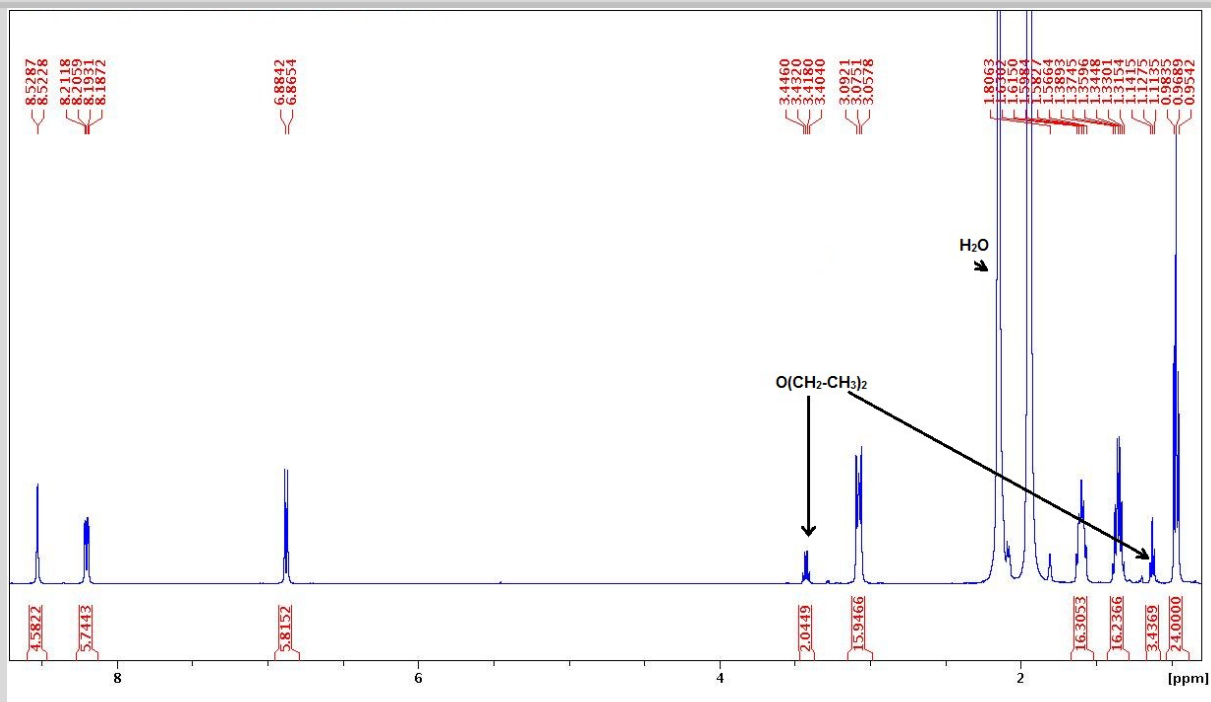

Figure 2S.  $^1\text{H}$  NMR spectra ( $\text{CH}_3\text{CN}$ ,  $25^\circ\text{C}$ ) of **2**.

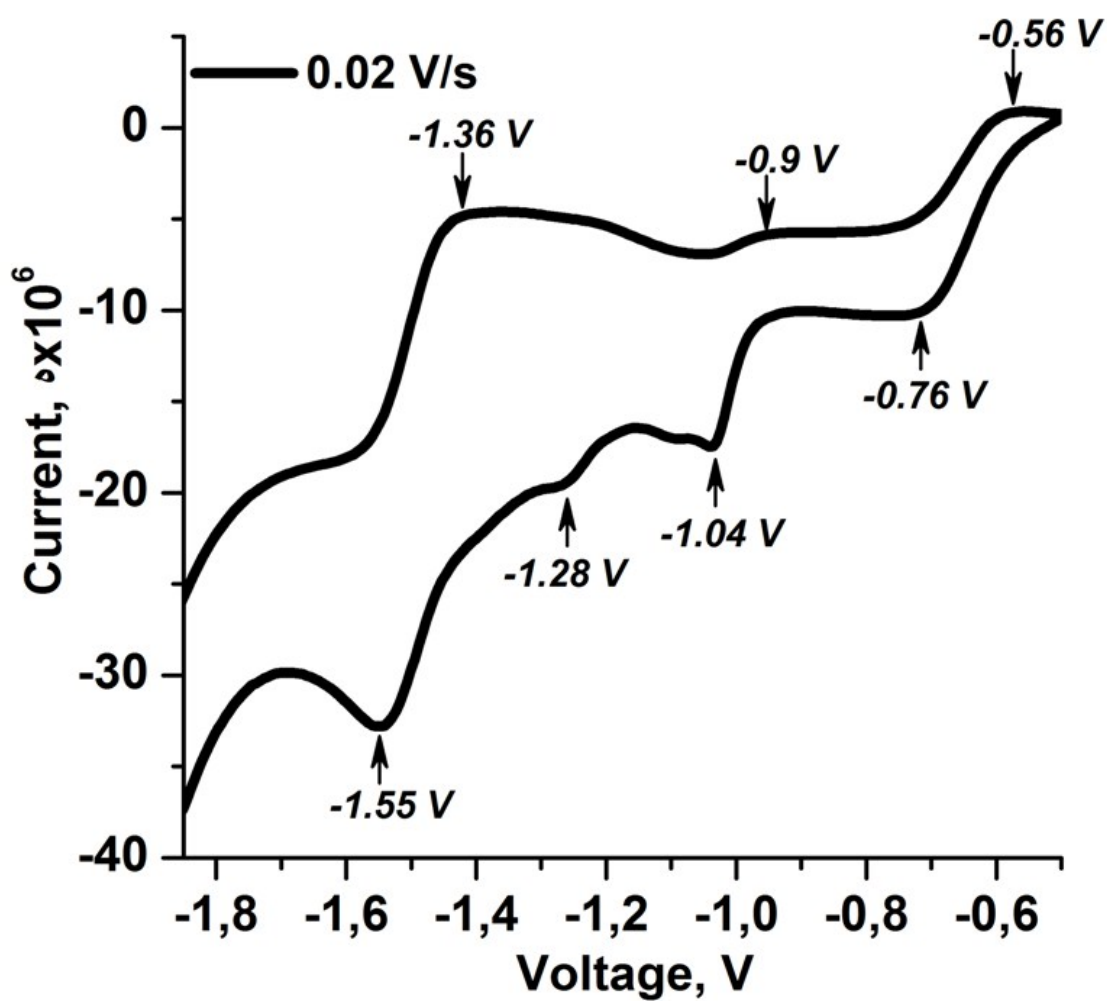

Fig S3. CV of  $(\text{Bu}_4\text{N})_2[\{\text{Mo}_6\text{I}_8\}(\text{OC}_6\text{H}_4\text{-p}(\text{NO}_2))_6]$  (1) at negative potentials. 2 mM solution in  $\text{CH}_3\text{CN}$  with 0.05 M  $\text{Bu}_4\text{NBF}_4$  as supporting electrolyte. Reference electrode Ag/AgCl.

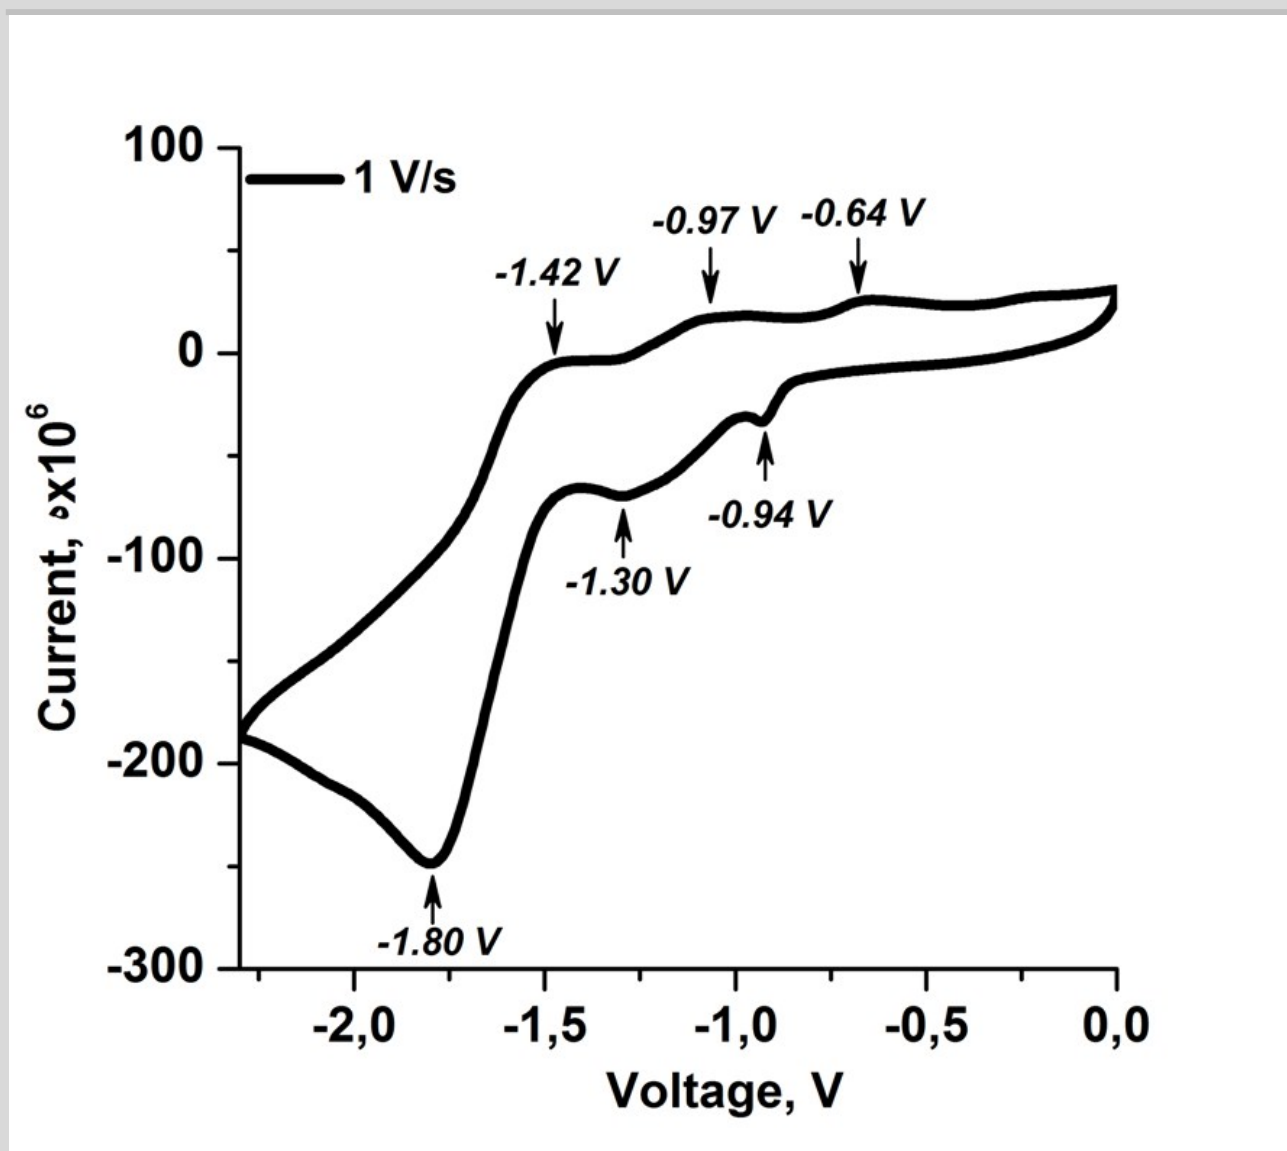

Fig S4. CV of  $(\text{Bu}_4\text{N})_2[\{\text{Mo}_6\text{I}_8\}(\text{OC}_6\text{H}_3\text{-}2,4\text{-(NO}_2)_2)_6]$  (**2**) at negative potentials. 0.2 mM solution in  $\text{CH}_3\text{CN}$  with 0.05 M  $\text{Bu}_4\text{NBF}_4$  as supporting electrolyte. Reference electrode  $\text{Ag}/\text{AgCl}$ .

Table S1. Bond distances and angles in **1**·CH<sub>3</sub>CN·H<sub>2</sub>O

| Bond          | d, Å       |
|---------------|------------|
| Mo(1)–Mo(2)#1 | 2.6612(13) |
| Mo(1)–Mo(2)   | 2.6700(13) |
| Mo(1)–Mo(3)   | 2.6596(14) |
| Mo(1)–Mo(3)#1 | 2.6695(15) |
| Mo(1)–I(1)    | 2.7934(12) |
| Mo(1)–I(2)    | 2.8015(12) |
| Mo(1)–I(3)    | 2.7966(12) |
| Mo(1)–I(4)#1  | 2.7913(12) |
| Mo(1)–O(1)    | 2.100(8)   |
| Mo(2)–Mo(1)#1 | 2.6611(13) |
| Mo(2)–Mo(3)   | 2.6566(13) |
| Mo(2)–Mo(3)#1 | 2.6676(13) |
| Mo(2)–I(1)    | 2.8007(13) |
| Mo(2)–I(2)    | 2.8104(12) |
| Mo(2)–I(3)#1  | 2.7909(13) |
| Mo(2)–I(4)    | 2.7980(12) |
| Mo(2)–O(2)    | 2.085(7)   |
| Mo(3)–Mo(1)#1 | 2.6695(15) |
| Mo(3)–Mo(2)#1 | 2.6676(13) |
| Mo(3)–I(1)    | 2.7986(12) |
| Mo(3)–I(2)#1  | 2.7916(12) |
| Mo(3)–I(3)    | 2.7910(12) |
| Mo(3)–I(4)    | 2.8157(12) |
| Mo(3)–O(3)    | 2.095(7)   |
| Mo(4)–Mo(5)#2 | 2.6589(13) |
| Mo(4)–Mo(5)   | 2.6646(16) |
| Mo(4)–Mo(6)   | 2.6611(14) |
| Mo(4)–Mo(6)#2 | 2.6651(16) |
| Mo(4)–I(5)    | 2.7985(13) |
| Mo(4)–I(6)    | 2.7988(14) |
| Mo(4)–I(7)#2  | 2.7800(13) |
| Mo(4)–I(8)    | 2.7990(15) |
| Mo(4)–O(4)    | 2.083(8)   |
| Mo(5)–Mo(4)#2 | 2.6589(13) |
| Mo(5)–Mo(6)#2 | 2.6691(14) |
| Mo(5)–Mo(6)   | 2.6709(16) |
| Mo(5)–I(5)    | 2.7847(14) |
| Mo(5)–I(6)    | 2.7918(13) |
| Mo(5)–I(7)    | 2.7966(13) |
| Mo(5)–I(8)#2  | 2.8014(14) |
| Mo(5)–O(5)    | 2.120(9)   |
| Mo(6)–Mo(4)#2 | 2.6651(16) |
| Mo(6)–Mo(5)#2 | 2.6691(14) |
| Mo(6)–I(5)    | 2.7987(12) |

---

|              |            |
|--------------|------------|
| Mo(6)–I(6)#2 | 2.7871(12) |
| Mo(6)–I(7)   | 2.7789(15) |
| Mo(6)–I(8)   | 2.8051(15) |
| Mo(6)–O(6)   | 2.079(9)   |
| I(2)–Mo(3)#1 | 2.7916(12) |
| I(3)–Mo(2)#1 | 2.7910(13) |
| I(4)–Mo(1)#1 | 2.7913(12) |
| I(6)–Mo(6)#2 | 2.7871(12) |
| I(7)–Mo(4)#2 | 2.7800(13) |
| I(8)–Mo(5)#2 | 2.8014(14) |
| O(1)–C(11)   | 1.216(13)  |
| O(2)–C(21)   | 1.221(11)  |
| O(3)–C(31)   | 1.288(13)  |
| O(4)–C(41)   | 1.248(13)  |
| O(5)–C(51)   | 1.283(14)  |
| O(6)–C(61)   | 1.297(14)  |
| N(1)–O(11)   | 1.239(13)  |
| N(1)–O(12)   | 1.255(13)  |
| N(1)–C(14)   | 1.448(15)  |
| N(2)–O(21)   | 1.215(14)  |
| N(2)–O(22)   | 1.237(13)  |
| N(2)–C(24)   | 1.469(14)  |
| N(3)–O(31)   | 1.239(19)  |
| N(3)–O(32)   | 1.211(18)  |
| N(3)–C(34)   | 1.452(16)  |
| N(4)–O(41)   | 1.221(16)  |
| N(4)–O(42)   | 1.207(15)  |
| N(4)–C(44)   | 1.452(18)  |
| N(5)–O(51)   | 1.255(17)  |
| N(5)–O(52)   | 1.213(16)  |
| N(5)–C(54)   | 1.471(15)  |
| N(6)–O(61)   | 1.247(13)  |
| N(6)–O(62)   | 1.213(13)  |
| N(6)–C(64)   | 1.469(16)  |
| C(11)–C(12)  | 1.479(16)  |
| C(11)–C(16)  | 1.395(15)  |
| C(12)–C(13)  | 1.353(15)  |
| C(13)–C(14)  | 1.380(16)  |
| C(14)–C(15)  | 1.383(15)  |
| C(15)–C(16)  | 1.386(16)  |
| C(21)–C(22)  | 1.418(14)  |
| C(21)–C(26)  | 1.437(15)  |
| C(22)–C(23)  | 1.394(16)  |
| C(23)–C(24)  | 1.365(17)  |
| C(24)–C(25)  | 1.401(16)  |
| C(25)–C(26)  | 1.373(15)  |
| C(31)–C(32)  | 1.419(16)  |
| C(31)–C(36)  | 1.410(16)  |

---

---

|               |           |
|---------------|-----------|
| C(32)–C(33)   | 1.369(16) |
| C(33)–C(34)   | 1.389(19) |
| C(34)–C(35)   | 1.389(19) |
| C(35)–C(36)   | 1.385(16) |
| C(41)–C(42)   | 1.417(17) |
| C(41)–C(46)   | 1.458(15) |
| C(42)–C(43)   | 1.378(17) |
| C(43)–C(44)   | 1.393(16) |
| C(44)–C(45)   | 1.362(17) |
| C(45)–C(46)   | 1.364(17) |
| C(51)–C(52)   | 1.390(16) |
| C(51)–C(56)   | 1.391(18) |
| C(52)–C(53)   | 1.391(15) |
| C(53)–C(54)   | 1.381(18) |
| C(54)–C(55)   | 1.371(17) |
| C(55)–C(56)   | 1.375(17) |
| C(61)–C(62)   | 1.422(17) |
| C(61)–C(66)   | 1.399(17) |
| C(62)–C(63)   | 1.372(17) |
| C(63)–C(64)   | 1.387(17) |
| C(64)–C(65)   | 1.375(17) |
| C(65)–C(66)   | 1.382(16) |
| N(11)–C(111)  | 1.534(14) |
| N(11)–C(121)  | 1.526(15) |
| N(11)–C(131)  | 1.529(13) |
| N(11)–C(141)  | 1.511(15) |
| C(111)–C(112) | 1.466(16) |
| C(112)–C(113) | 1.474(18) |
| C(113)–C(114) | 1.38(2)   |
| C(121)–C(122) | 1.468(17) |
| C(122)–C(123) | 1.577(18) |
| C(123)–C(124) | 1.494(18) |
| C(131)–C(132) | 1.516(17) |
| C(132)–C(133) | 1.516(16) |
| C(133)–C(134) | 1.544(17) |
| C(141)–C(142) | 1.460(18) |
| C(142)–C(143) | 1.52(2)   |
| C(143)–C(144) | 1.39(2)   |
| N(21)–C(211)  | 1.49(2)   |
| N(21)–C(221)  | 1.58(2)   |
| N(21)–C(231)  | 1.51(2)   |
| N(21)–C(241)  | 1.54(2)   |
| C(214)–C(213) | 1.44(2)   |
| C(211)–C(212) | 1.52(2)   |
| C(212)–C(213) | 1.57(2)   |
| C(221)–C(222) | 1.38(3)   |
| C(222)–C(223) | 1.58(3)   |
| C(223)–C(22C) | 1.31(4)   |

---

---

|                       |                  |
|-----------------------|------------------|
| C(223)–C(22D)         | 1.47(4)          |
| C(231)–C(23A)         | 1.56(6)          |
| C(231)–C(23B)         | 1.42(2)          |
| C(23A)–C(233)         | 1.51(6)          |
| C(23B)–C(233)         | 1.69(3)          |
| C(233)–C(234)         | 1.47(3)          |
| C(241)–C(242)         | 1.55(2)          |
| C(242)–C(243)         | 1.53(3)          |
| C(243)–C(244)         | 1.53(2)          |
| N(1S)–C(1S)           | 1.10(2)          |
| C(1S)–C(2S)           | 1.40(2)          |
| <hr/>                 |                  |
| angle                 | $\omega, ^\circ$ |
| Mo(2)#1–Mo(1)–Mo(2)   | 89.90(4)         |
| Mo(2)#1–Mo(1)–Mo(3)#1 | 59.78(4)         |
| Mo(2)#1–Mo(1)–I(1)    | 121.87(4)        |
| Mo(2)–Mo(1)–I(1)      | 61.63(3)         |
| Mo(2)#1–Mo(1)–I(2)    | 121.06(5)        |
| Mo(2)–Mo(1)–I(2)      | 61.76(3)         |
| Mo(2)#1–Mo(1)–I(3)    | 61.45(3)         |
| Mo(2)–Mo(1)–I(3)      | 121.26(4)        |
| Mo(2)#1–Mo(1)–I(4)#1  | 61.69(3)         |
| Mo(2)–Mo(1)–I(4)#1    | 121.96(5)        |
| Mo(3)–Mo(1)–Mo(2)#1   | 60.18(4)         |
| Mo(3)–Mo(1)–Mo(2)     | 59.80(3)         |
| Mo(3)#1–Mo(1)–Mo(2)   | 59.95(4)         |
| Mo(3)–Mo(1)–Mo(3)#1   | 89.85(4)         |
| Mo(3)–Mo(1)–I(1)      | 61.70(3)         |
| Mo(3)#1–Mo(1)–I(1)    | 121.56(4)        |
| Mo(3)–Mo(1)–I(2)      | 121.55(4)        |
| Mo(3)#1–Mo(1)–I(2)    | 61.30(3)         |
| Mo(3)–Mo(1)–I(3)      | 61.47(3)         |
| Mo(3)#1–Mo(1)–I(3)    | 121.23(4)        |
| Mo(3)–Mo(1)–I(4)#1    | 121.85(4)        |
| Mo(3)#1–Mo(1)–I(4)#1  | 62.03(3)         |
| I(1)–Mo(1)–I(2)       | 90.20(3)         |
| I(1)–Mo(1)–I(3)       | 90.11(4)         |
| I(3)–Mo(1)–I(2)       | 176.58(5)        |
| I(4)#1–Mo(1)–I(1)     | 175.63(5)        |
| I(4)#1–Mo(1)–I(2)     | 89.69(4)         |
| I(4)#1–Mo(1)–I(3)     | 89.74(3)         |
| O(1)–Mo(1)–Mo(2)#1    | 130.7(2)         |
| O(1)–Mo(1)–Mo(2)      | 139.4(2)         |
| O(1)–Mo(1)–Mo(3)      | 135.6(2)         |
| O(1)–Mo(1)–Mo(3)#1    | 134.2(2)         |
| O(1)–Mo(1)–I(1)       | 91.5(2)          |
| O(1)–Mo(1)–I(2)       | 90.8(2)          |
| O(1)–Mo(1)–I(3)       | 85.8(2)          |

---



---

|                       |           |
|-----------------------|-----------|
| O(1)–Mo(1)–I(4)#1     | 84.1(2)   |
| Mo(1)#1–Mo(2)–Mo(1)   | 90.11(4)  |
| Mo(1)#1–Mo(2)–Mo(3)#1 | 59.88(3)  |
| Mo(1)#1–Mo(2)–I(1)    | 121.89(4) |
| Mo(1)–Mo(2)–I(1)      | 61.35(3)  |
| Mo(1)#1–Mo(2)–I(2)    | 121.07(4) |
| Mo(1)–Mo(2)–I(2)      | 61.42(3)  |
| Mo(1)#1–Mo(2)–I(3)#1  | 61.67(3)  |
| Mo(1)–Mo(2)–I(3)#1    | 121.45(4) |
| Mo(1)#1–Mo(2)–I(4)    | 61.44(3)  |
| Mo(1)–Mo(2)–I(4)      | 121.99(4) |
| Mo(3)–Mo(2)–Mo(1)#1   | 60.26(4)  |
| Mo(3)–Mo(2)–Mo(1)     | 59.91(4)  |
| Mo(3)#1–Mo(2)–Mo(1)   | 60.02(4)  |
| Mo(3)–Mo(2)–Mo(3)#1   | 89.96(4)  |
| Mo(3)–Mo(2)–I(1)      | 61.64(3)  |
| Mo(3)#1–Mo(2)–I(1)    | 121.36(4) |
| Mo(3)–Mo(2)–I(2)      | 121.32(4) |
| Mo(3)#1–Mo(2)–I(2)    | 61.21(3)  |
| Mo(3)–Mo(2)–I(3)#1    | 121.92(4) |
| Mo(3)#1–Mo(2)–I(3)#1  | 61.45(3)  |
| Mo(3)–Mo(2)–I(4)      | 62.09(3)  |
| Mo(3)#1–Mo(2)–I(4)    | 121.30(4) |
| I(1)–Mo(2)–I(2)       | 89.87(4)  |
| I(3)#1–Mo(2)–I(1)     | 176.05(4) |
| I(3)#1–Mo(2)–I(2)     | 89.37(4)  |
| I(3)#1–Mo(2)–I(4)     | 89.72(4)  |
| I(4)–Mo(2)–I(1)       | 90.79(4)  |
| I(4)–Mo(2)–I(2)       | 176.28(4) |
| O(2)–Mo(2)–Mo(1)#1    | 134.9(2)  |
| O(2)–Mo(2)–Mo(1)      | 134.8(2)  |
| O(2)–Mo(2)–Mo(3)      | 137.9(2)  |
| O(2)–Mo(2)–Mo(3)#1    | 132.1(2)  |
| O(2)–Mo(2)–I(1)       | 90.1(2)   |
| O(2)–Mo(2)–I(2)       | 86.3(2)   |
| O(2)–Mo(2)–I(3)#1     | 86.0(2)   |
| O(2)–Mo(2)–I(4)       | 90.0(2)   |
| Mo(1)–Mo(3)–Mo(1)#1   | 90.15(4)  |
| Mo(1)–Mo(3)–Mo(2)#1   | 59.94(3)  |
| Mo(1)–Mo(3)–I(1)      | 61.50(3)  |
| Mo(1)#1–Mo(3)–I(1)    | 121.66(4) |
| Mo(1)–Mo(3)–I(2)#1    | 121.84(4) |
| Mo(1)#1–Mo(3)–I(2)#1  | 61.68(3)  |
| Mo(1)–Mo(3)–I(3)      | 61.68(3)  |
| Mo(1)#1–Mo(3)–I(3)    | 121.47(4) |
| Mo(1)–Mo(3)–I(4)      | 121.71(4) |
| Mo(1)#1–Mo(3)–I(4)    | 61.11(3)  |
| Mo(2)–Mo(3)–Mo(1)     | 60.30(4)  |

---

---

|                       |           |
|-----------------------|-----------|
| Mo(2)–Mo(3)–Mo(1)#1   | 59.95(4)  |
| Mo(2)#1–Mo(3)–Mo(1)#1 | 60.04(4)  |
| Mo(2)–Mo(3)–Mo(2)#1   | 90.05(4)  |
| Mo(2)–Mo(3)–I(1)      | 61.72(3)  |
| Mo(2)#1–Mo(3)–I(1)    | 121.43(4) |
| Mo(2)–Mo(3)–I(2)#1    | 121.61(5) |
| Mo(2)#1–Mo(3)–I(2)#1  | 61.92(3)  |
| Mo(2)–Mo(3)–I(3)      | 121.97(4) |
| Mo(2)#1–Mo(3)–I(3)    | 61.45(3)  |
| Mo(2)–Mo(3)–I(4)      | 61.42(3)  |
| Mo(2)#1–Mo(3)–I(4)    | 121.13(5) |
| I(1)–Mo(3)–I(4)       | 90.47(3)  |
| I(2)#1–Mo(3)–I(1)     | 175.90(5) |
| I(2)#1–Mo(3)–I(4)     | 89.40(4)  |
| I(3)–Mo(3)–I(1)       | 90.12(4)  |
| I(3)–Mo(3)–I(2)#1     | 89.75(3)  |
| I(3)–Mo(3)–I(4)       | 176.27(5) |
| O(3)–Mo(3)–Mo(1)      | 132.3(2)  |
| O(3)–Mo(3)–Mo(1)#1    | 137.4(2)  |
| O(3)–Mo(3)–Mo(2)      | 131.9(2)  |
| O(3)–Mo(3)–Mo(2)#1    | 138.0(2)  |
| O(3)–Mo(3)–I(1)       | 84.2(2)   |
| O(3)–Mo(3)–I(2)#1     | 91.7(2)   |
| O(3)–Mo(3)–I(3)       | 88.4(2)   |
| O(3)–Mo(3)–I(4)       | 88.0(2)   |
| Mo(5)#2–Mo(4)–Mo(5)   | 90.30(4)  |
| Mo(5)#2–Mo(4)–Mo(6)   | 60.23(4)  |
| Mo(5)#2–Mo(4)–Mo(6)#2 | 60.22(4)  |
| Mo(5)–Mo(4)–Mo(6)#2   | 60.11(4)  |
| Mo(5)#2–Mo(4)–I(5)    | 121.84(5) |
| Mo(5)–Mo(4)–I(5)      | 61.23(4)  |
| Mo(5)#2–Mo(4)–I(6)    | 121.49(5) |
| Mo(5)–Mo(4)–I(6)      | 61.40(4)  |
| Mo(5)#2–Mo(4)–I(7)#2  | 61.84(3)  |
| Mo(5)–Mo(4)–I(7)#2    | 121.41(5) |
| Mo(5)#2–Mo(4)–I(8)    | 61.70(4)  |
| Mo(5)–Mo(4)–I(8)      | 121.95(5) |
| Mo(6)–Mo(4)–Mo(5)     | 60.20(4)  |
| Mo(6)–Mo(4)–Mo(6)#2   | 90.36(4)  |
| Mo(6)–Mo(4)–I(5)      | 61.62(3)  |
| Mo(6)#2–Mo(4)–I(5)    | 121.32(5) |
| Mo(6)–Mo(4)–I(6)      | 121.59(5) |
| Mo(6)#2–Mo(4)–I(6)    | 61.28(4)  |
| Mo(6)–Mo(4)–I(7)#2    | 122.06(4) |
| Mo(6)#2–Mo(4)–I(7)#2  | 61.33(4)  |
| Mo(6)–Mo(4)–I(8)      | 61.76(4)  |
| Mo(6)#2–Mo(4)–I(8)    | 121.91(4) |
| I(5)–Mo(4)–I(6)       | 89.62(4)  |

---

---

|                       |           |
|-----------------------|-----------|
| I(5)–Mo(4)–I(8)       | 90.39(4)  |
| I(6)–Mo(4)–I(8)       | 175.98(5) |
| I(7)#2–Mo(4)–I(5)     | 176.02(5) |
| I(7)#2–Mo(4)–I(6)     | 89.37(4)  |
| I(7)#2–Mo(4)–I(8)     | 90.34(4)  |
| O(4)–Mo(4)–Mo(5)#2    | 138.5(2)  |
| O(4)–Mo(4)–Mo(5)      | 131.2(2)  |
| O(4)–Mo(4)–Mo(6)      | 134.5(3)  |
| O(4)–Mo(4)–Mo(6)#2    | 134.9(3)  |
| O(4)–Mo(4)–I(5)       | 85.4(2)   |
| O(4)–Mo(4)–I(6)       | 85.8(3)   |
| O(4)–Mo(4)–I(7)#2     | 90.7(2)   |
| O(4)–Mo(4)–I(8)       | 90.2(3)   |
| Mo(4)#2–Mo(5)–Mo(4)   | 89.70(4)  |
| Mo(4)#2–Mo(5)–Mo(6)#2 | 59.93(4)  |
| Mo(4)–Mo(5)–Mo(6)#2   | 59.96(4)  |
| Mo(4)#2–Mo(5)–Mo(6)   | 60.00(4)  |
| Mo(4)–Mo(5)–Mo(6)     | 59.83(4)  |
| Mo(4)#2–Mo(5)–I(5)    | 121.68(5) |
| Mo(4)–Mo(5)–I(5)      | 61.76(4)  |
| Mo(4)#2–Mo(5)–I(6)    | 121.25(5) |
| Mo(4)–Mo(5)–I(6)      | 61.67(4)  |
| Mo(4)#2–Mo(5)–I(7)    | 61.21(3)  |
| Mo(4)–Mo(5)–I(7)      | 120.87(5) |
| Mo(4)#2–Mo(5)–I(8)#2  | 61.61(4)  |
| Mo(4)–Mo(5)–I(8)#2    | 121.59(5) |
| Mo(6)#2–Mo(5)–Mo(6)   | 90.06(5)  |
| Mo(6)#2–Mo(5)–I(5)    | 121.69(5) |
| Mo(6)–Mo(5)–I(5)      | 61.68(4)  |
| Mo(6)#2–Mo(5)–I(6)    | 61.33(3)  |
| Mo(6)–Mo(5)–I(6)      | 121.49(5) |
| Mo(6)#2–Mo(5)–I(7)    | 121.13(4) |
| Mo(6)–Mo(5)–I(7)      | 61.04(4)  |
| Mo(6)#2–Mo(5)–I(8)#2  | 61.64(4)  |
| Mo(6)–Mo(5)–I(8)#2    | 121.60(4) |
| I(5)–Mo(5)–I(6)       | 90.05(4)  |
| I(5)–Mo(5)–I(7)       | 89.91(4)  |
| I(5)–Mo(5)–I(8)#2     | 175.95(5) |
| I(6)–Mo(5)–I(7)       | 176.94(5) |
| I(6)–Mo(5)–I(8)#2     | 89.87(4)  |
| I(7)–Mo(5)–I(8)#2     | 89.95(4)  |
| O(5)–Mo(5)–Mo(4)#2    | 132.9(2)  |
| O(5)–Mo(5)–Mo(4)      | 137.3(2)  |
| O(5)–Mo(5)–Mo(6)#2    | 136.4(3)  |
| O(5)–Mo(5)–Mo(6)      | 133.5(3)  |
| O(5)–Mo(5)–I(5)       | 88.4(3)   |
| O(5)–Mo(5)–I(6)       | 90.8(2)   |
| O(5)–Mo(5)–I(7)       | 86.1(2)   |

---

---

|                       |           |
|-----------------------|-----------|
| O(5)–Mo(5)–I(8)#2     | 87.5(3)   |
| Mo(4)–Mo(6)–Mo(4)#2   | 89.64(4)  |
| Mo(4)–Mo(6)–Mo(5)#2   | 59.85(4)  |
| Mo(4)#2–Mo(6)–Mo(5)#2 | 59.94(4)  |
| Mo(4)–Mo(6)–Mo(5)     | 59.96(4)  |
| Mo(4)#2–Mo(6)–Mo(5)   | 59.77(4)  |
| Mo(4)–Mo(6)–I(5)      | 61.61(3)  |
| Mo(4)#2–Mo(6)–I(5)    | 120.92(5) |
| Mo(4)–Mo(6)–I(6)#2    | 121.34(5) |
| Mo(4)#2–Mo(6)–I(6)#2  | 61.72(4)  |
| Mo(4)–Mo(6)–I(7)      | 121.67(5) |
| Mo(4)#2–Mo(6)–I(7)    | 61.37(4)  |
| Mo(4)–Mo(6)–I(8)      | 61.54(4)  |
| Mo(4)#2–Mo(6)–I(8)    | 121.43(5) |
| Mo(5)#2–Mo(6)–Mo(5)   | 89.94(5)  |
| Mo(5)#2–Mo(6)–I(5)    | 121.45(5) |
| Mo(5)–Mo(6)–I(5)      | 61.16(4)  |
| Mo(5)#2–Mo(6)–I(6)#2  | 61.50(3)  |
| Mo(5)–Mo(6)–I(6)#2    | 121.48(5) |
| Mo(5)#2–Mo(6)–I(7)    | 121.29(5) |
| Mo(5)–Mo(6)–I(7)      | 61.71(4)  |
| Mo(5)#2–Mo(6)–I(8)    | 61.50(4)  |
| Mo(5)–Mo(6)–I(8)      | 121.49(5) |
| I(5)–Mo(6)–I(8)       | 90.27(4)  |
| I(6)#2–Mo(6)–I(5)     | 176.57(5) |
| I(6)#2–Mo(6)–I(8)     | 89.90(4)  |
| I(7)–Mo(6)–I(5)       | 89.99(4)  |
| I(7)–Mo(6)–I(6)#2     | 89.63(4)  |
| I(7)–Mo(6)–I(8)       | 176.31(5) |
| O(6)–Mo(6)–Mo(4)      | 130.7(2)  |
| O(6)–Mo(6)–Mo(4)#2    | 139.6(2)  |
| O(6)–Mo(6)–Mo(5)#2    | 135.0(3)  |
| O(6)–Mo(6)–Mo(5)      | 134.8(2)  |
| O(6)–Mo(6)–I(5)       | 85.3(2)   |
| O(6)–Mo(6)–I(6)#2     | 91.3(2)   |
| O(6)–Mo(6)–I(7)       | 91.2(3)   |
| O(6)–Mo(6)–I(8)       | 85.1(3)   |
| Mo(1)–I(1)–Mo(2)      | 57.02(3)  |
| Mo(1)–I(1)–Mo(3)      | 56.80(3)  |
| Mo(3)–I(1)–Mo(2)      | 56.65(3)  |
| Mo(1)–I(2)–Mo(2)      | 56.82(3)  |
| Mo(3)#1–I(2)–Mo(1)    | 57.02(3)  |
| Mo(3)#1–I(2)–Mo(2)    | 56.87(3)  |
| Mo(2)#1–I(3)–Mo(1)    | 56.88(3)  |
| Mo(2)#1–I(3)–Mo(3)    | 57.10(3)  |
| Mo(3)–I(3)–Mo(1)      | 56.85(3)  |
| Mo(1)#1–I(4)–Mo(2)    | 56.86(3)  |
| Mo(1)#1–I(4)–Mo(3)    | 56.86(3)  |

---

## FULL PAPER

---

|                    |           |
|--------------------|-----------|
| Mo(2)–I(4)–Mo(3)   | 56.49(3)  |
| Mo(4)–I(5)–Mo(6)   | 56.78(3)  |
| Mo(5)–I(5)–Mo(4)   | 57.01(4)  |
| Mo(5)–I(5)–Mo(6)   | 57.16(3)  |
| Mo(5)–I(6)–Mo(4)   | 56.93(4)  |
| Mo(6)#2–I(6)–Mo(4) | 56.99(3)  |
| Mo(6)#2–I(6)–Mo(5) | 57.17(3)  |
| Mo(4)#2–I(7)–Mo(5) | 56.95(3)  |
| Mo(6)–I(7)–Mo(4)#2 | 57.30(4)  |
| Mo(6)–I(7)–Mo(5)   | 57.25(4)  |
| Mo(4)–I(8)–Mo(5)#2 | 56.69(3)  |
| Mo(4)–I(8)–Mo(6)   | 56.70(4)  |
| Mo(5)#2–I(8)–Mo(6) | 56.86(4)  |
| C(11)–O(1)–Mo(1)   | 141.0(7)  |
| C(21)–O(2)–Mo(2)   | 143.4(7)  |
| C(31)–O(3)–Mo(3)   | 132.2(7)  |
| C(41)–O(4)–Mo(4)   | 142.3(7)  |
| C(51)–O(5)–Mo(5)   | 135.3(8)  |
| C(61)–O(6)–Mo(6)   | 146.7(8)  |
| O(11)–N(1)–O(12)   | 121.0(11) |
| O(11)–N(1)–C(14)   | 120.4(11) |
| O(12)–N(1)–C(14)   | 118.5(11) |
| O(21)–N(2)–O(22)   | 123.4(11) |
| O(21)–N(2)–C(24)   | 119.1(11) |
| O(22)–N(2)–C(24)   | 117.2(11) |
| O(31)–N(3)–C(34)   | 120.0(16) |
| O(32)–N(3)–O(31)   | 122.7(13) |
| O(32)–N(3)–C(34)   | 117.2(17) |
| O(41)–N(4)–C(44)   | 117.7(13) |
| O(42)–N(4)–O(41)   | 125.7(15) |
| O(42)–N(4)–C(44)   | 116.5(14) |
| O(51)–N(5)–C(54)   | 117.5(13) |
| O(52)–N(5)–O(51)   | 125.3(13) |
| O(52)–N(5)–C(54)   | 117.1(14) |
| O(61)–N(6)–C(64)   | 115.9(12) |
| O(62)–N(6)–O(61)   | 124.4(12) |
| O(62)–N(6)–C(64)   | 119.7(11) |
| O(1)–C(11)–C(12)   | 123.5(10) |
| O(1)–C(11)–C(16)   | 124.5(11) |
| C(16)–C(11)–C(12)  | 111.9(11) |
| C(13)–C(12)–C(11)  | 123.3(11) |
| C(12)–C(13)–C(14)  | 119.4(11) |
| C(13)–C(14)–N(1)   | 118.8(10) |
| C(13)–C(14)–C(15)  | 121.9(11) |
| C(15)–C(14)–N(1)   | 119.2(11) |
| C(14)–C(15)–C(16)  | 117.2(11) |
| C(15)–C(16)–C(11)  | 126.1(11) |
| O(2)–C(21)–C(22)   | 120.4(10) |

---

## FULL PAPER

---

|                   |           |
|-------------------|-----------|
| O(2)–C(21)–C(26)  | 126.1(9)  |
| C(22)–C(21)–C(26) | 113.5(9)  |
| C(23)–C(22)–C(21) | 124.7(12) |
| C(24)–C(23)–C(22) | 117.6(11) |
| C(23)–C(24)–N(2)  | 119.5(11) |
| C(23)–C(24)–C(25) | 122.2(10) |
| C(25)–C(24)–N(2)  | 118.2(11) |
| C(26)–C(25)–C(24) | 118.7(11) |
| C(25)–C(26)–C(21) | 123.2(11) |
| O(3)–C(31)–C(32)  | 121.4(11) |
| O(3)–C(31)–C(36)  | 121.1(11) |
| C(36)–C(31)–C(32) | 117.5(11) |
| C(33)–C(32)–C(31) | 121.3(13) |
| C(32)–C(33)–C(34) | 118.9(13) |
| C(33)–C(34)–N(3)  | 119.9(14) |
| C(35)–C(34)–N(3)  | 117.4(14) |
| C(35)–C(34)–C(33) | 122.7(12) |
| C(36)–C(35)–C(34) | 117.6(13) |
| C(35)–C(36)–C(31) | 122.1(13) |
| O(4)–C(41)–C(42)  | 125.2(10) |
| O(4)–C(41)–C(46)  | 118.7(11) |
| C(42)–C(41)–C(46) | 115.9(11) |
| C(43)–C(42)–C(41) | 121.4(11) |
| C(42)–C(43)–C(44) | 120.8(12) |
| C(43)–C(44)–N(4)  | 119.4(13) |
| C(45)–C(44)–N(4)  | 121.3(12) |
| C(45)–C(44)–C(43) | 119.3(12) |
| C(44)–C(45)–C(46) | 122.4(12) |
| C(45)–C(46)–C(41) | 120.2(12) |
| O(5)–C(51)–C(52)  | 121.4(12) |
| O(5)–C(51)–C(56)  | 122.4(12) |
| C(52)–C(51)–C(56) | 116.2(11) |
| C(51)–C(52)–C(53) | 122.8(12) |
| C(54)–C(53)–C(52) | 117.5(12) |
| C(53)–C(54)–N(5)  | 119.6(12) |
| C(55)–C(54)–N(5)  | 118.2(13) |
| C(55)–C(54)–C(53) | 122.2(11) |
| C(54)–C(55)–C(56) | 118.3(13) |
| C(55)–C(56)–C(51) | 122.9(13) |
| O(6)–C(61)–C(62)  | 116.6(12) |
| O(6)–C(61)–C(66)  | 124.5(11) |
| C(66)–C(61)–C(62) | 118.9(12) |
| C(63)–C(62)–C(61) | 120.0(13) |
| C(62)–C(63)–C(64) | 119.7(13) |
| C(63)–C(64)–N(6)  | 120.0(12) |
| C(65)–C(64)–N(6)  | 118.7(12) |
| C(65)–C(64)–C(63) | 121.4(12) |
| C(64)–C(65)–C(66) | 119.9(12) |

---

## FULL PAPER

---

|                      |           |
|----------------------|-----------|
| C(65)–C(66)–C(61)    | 120.1(12) |
| C(121)–N(11)–C(111)  | 108.4(9)  |
| C(121)–N(11)–C(131)  | 110.9(9)  |
| C(131)–N(11)–C(111)  | 108.4(9)  |
| C(141)–N(11)–C(111)  | 110.7(9)  |
| C(141)–N(11)–C(121)  | 108.9(9)  |
| C(141)–N(11)–C(131)  | 109.5(9)  |
| C(112)–C(111)–N(11)  | 116.5(10) |
| C(111)–C(112)–C(113) | 112.6(12) |
| C(114)–C(113)–C(112) | 119.0(17) |
| C(122)–C(121)–N(11)  | 113.9(10) |
| C(121)–C(122)–C(123) | 110.3(11) |
| C(124)–C(123)–C(122) | 110.2(12) |
| C(132)–C(131)–N(11)  | 115.2(11) |
| C(133)–C(132)–C(131) | 113.0(11) |
| C(132)–C(133)–C(134) | 114.7(10) |
| C(142)–C(141)–N(11)  | 118.9(12) |
| C(141)–C(142)–C(143) | 109.6(14) |
| C(144)–C(143)–C(142) | 119(2)    |
| C(211)–N(21)–C(221)  | 109.6(13) |
| C(211)–N(21)–C(231)  | 109.6(17) |
| C(211)–N(21)–C(241)  | 112.2(15) |
| C(231)–N(21)–C(221)  | 112.1(14) |
| C(231)–N(21)–C(241)  | 109.4(13) |
| C(241)–N(21)–C(221)  | 103.9(15) |
| N(21)–C(211)–C(212)  | 111.1(16) |
| C(211)–C(212)–C(213) | 105.7(16) |
| C(214)–C(213)–C(212) | 110.1(18) |
| C(222)–C(221)–N(21)  | 115(2)    |
| C(221)–C(222)–C(223) | 108(2)    |
| C(22C)–C(223)–C(222) | 126(3)    |
| C(22C)–C(223)–C(22D) | 56(2)     |
| C(22D)–C(223)–C(222) | 125(3)    |
| N(21)–C(231)–C(23A)  | 148(3)    |
| C(23B)–C(231)–N(21)  | 116.6(17) |
| C(23B)–C(231)–C(23A) | 70(2)     |
| C(233)–C(23A)–C(231) | 105(4)    |
| C(231)–C(23B)–C(233) | 101.9(17) |
| C(23A)–C(233)–C(23B) | 64(2)     |
| C(234)–C(233)–C(23A) | 151(3)    |
| C(234)–C(233)–C(23B) | 102(2)    |
| N(21)–C(241)–C(242)  | 117.4(14) |
| C(243)–C(242)–C(241) | 108.3(15) |
| C(242)–C(243)–C(244) | 111(2)    |
| N(1S)–C(1S)–C(2S)    | 177(2)    |

Symmetry transformations used to generate equivalent atoms:

#1  $-x, -y + 2, -z + 2$  #2  $-x, -y + 1, -z + 1$

---

Table S2. Bond distances and angles in 2·3THF

| Bond          | d, Å       |
|---------------|------------|
| Mo(1)–Mo(2)#1 | 2.6444(15) |
| Mo(1)–Mo(2)   | 2.6822(14) |
| Mo(1)–Mo(3)   | 2.6591(14) |
| Mo(1)–Mo(3)#1 | 2.6734(17) |
| Mo(1)–I(1)    | 2.7858(14) |
| Mo(1)–I(2)    | 2.7786(13) |
| Mo(1)–I(3)#1  | 2.7823(14) |
| Mo(1)–I(4)    | 2.7942(13) |
| Mo(1)–O(11)   | 2.105(8)   |
| Mo(2)–Mo(1)#1 | 2.6444(15) |
| Mo(2)–Mo(3)#1 | 2.6622(15) |
| Mo(2)–Mo(3)   | 2.6640(15) |
| Mo(2)–I(1)    | 2.7939(16) |
| Mo(2)–I(2)    | 2.7778(12) |
| Mo(2)–I(3)    | 2.7871(13) |
| Mo(2)–I(4)#1  | 2.8026(16) |
| Mo(2)–O(21)   | 2.069(7)   |
| Mo(3)–Mo(1)#1 | 2.6734(17) |
| Mo(3)–Mo(2)#1 | 2.6623(15) |
| Mo(3)–I(1)    | 2.7918(13) |
| Mo(3)–I(2)#1  | 2.7713(13) |
| Mo(3)–I(3)    | 2.7624(13) |
| Mo(3)–I(4)    | 2.7769(13) |
| Mo(3)–O(31)   | 2.090(9)   |
| I(2)–Mo(3)#1  | 2.7713(13) |
| I(3)–Mo(1)#1  | 2.7825(14) |
| I(4)–Mo(2)#1  | 2.8025(16) |
| O(11)–C(11)   | 1.289(13)  |
| O(12)–N(11)   | 1.233(14)  |
| O(13)–N(11)   | 1.226(14)  |
| O(14A)–N(12)  | 1.23(2)    |
| O(15A)–N(12)  | 1.206(18)  |
| O(14B)–N(12)  | 1.22(3)    |
| O(15B)–N(12)  | 1.26(3)    |
| O(21)–C(21)   | 1.276(13)  |
| O(22)–N(21)   | 1.251(14)  |
| O(23)–N(21)   | 1.221(15)  |
| O(24)–N(22)   | 1.219(14)  |
| O(25)–N(22)   | 1.211(13)  |
| O(31)–C(31)   | 1.268(15)  |
| O(32)–N(31)   | 1.224(16)  |
| O(33)–N(31)   | 1.244(15)  |
| O(34)–N(32)   | 1.235(14)  |
| O(35)–N(32)   | 1.228(14)  |



## FULL PAPER

---

|               |           |
|---------------|-----------|
| N(11)–C(14)   | 1.452(16) |
| N(12)–C(12)   | 1.463(16) |
| N(21)–C(24)   | 1.445(16) |
| N(22)–C(22)   | 1.458(17) |
| N(31)–C(34)   | 1.451(17) |
| N(32)–C(32)   | 1.451(16) |
| C(11)–C(12)   | 1.403(17) |
| C(11)–C(16)   | 1.414(17) |
| C(12)–C(13)   | 1.377(17) |
| C(13)–C(14)   | 1.396(18) |
| C(14)–C(15)   | 1.361(18) |
| C(15)–C(16)   | 1.390(18) |
| C(21)–C(22)   | 1.445(17) |
| C(21)–C(26)   | 1.433(17) |
| C(22)–C(23)   | 1.369(17) |
| C(23)–C(24)   | 1.393(18) |
| C(24)–C(25)   | 1.404(18) |
| C(25)–C(26)   | 1.343(17) |
| C(31)–C(32)   | 1.447(18) |
| C(31)–C(36)   | 1.426(17) |
| C(32)–C(33)   | 1.375(18) |
| C(33)–C(34)   | 1.367(18) |
| C(34)–C(35)   | 1.403(19) |
| C(35)–C(36)   | 1.361(18) |
| N(1)–C(111)   | 1.502(16) |
| N(1)–C(121)   | 1.543(16) |
| N(1)–C(131)   | 1.506(17) |
| N(1)–C(141)   | 1.511(19) |
| C(111)–C(112) | 1.53(2)   |
| C(112)–C(113) | 1.541(19) |
| C(113)–C(114) | 1.49(2)   |
| C(121)–C(122) | 1.505(19) |
| C(122)–C(123) | 1.535(18) |
| C(123)–C(124) | 1.49(2)   |
| C(131)–C(132) | 1.548(18) |
| C(132)–C(133) | 1.55(2)   |
| C(133)–C(134) | 1.48(2)   |
| C(141)–C(142) | 1.508(19) |
| C(142)–C(143) | 1.49(2)   |
| C(143)–C(144) | 1.50(2)   |
| O(1S)–C(1S)   | 1.46(2)   |
| O(1S)–C(4S)   | 1.44(2)   |
| C(1S)–C(2SA)  | 1.52(6)   |
| C(1S)–C(2SB)  | 1.40(4)   |
| C(2SA)–C(3S)  | 1.49(6)   |
| C(2SB)–C(3S)  | 1.64(4)   |
| C(3S)–C(4S)   | 1.44(3)   |
| O(2S)–C(5S)   | 1.36(4)   |

---

---

|                       |                                    |
|-----------------------|------------------------------------|
| O(2S)–C(8S)           | 1.27(4)                            |
| C(5S)–C(6S)           | 1.45(4)                            |
| C(6S)–C(7S)           | 1.32(5)                            |
| C(7S)–C(8S)           | 1.50(5)                            |
| <b>Angle</b>          | <b><math>\omega, ^\circ</math></b> |
| Mo(2)#1–Mo(1)–Mo(2)   | 89.87(4)                           |
| Mo(2)#1–Mo(1)–Mo(3)   | 60.26(4)                           |
| Mo(2)#1–Mo(1)–Mo(3)#1 | 60.13(4)                           |
| Mo(2)#1–Mo(1)–I(1)    | 121.90(5)                          |
| Mo(2)–Mo(1)–I(1)      | 61.42(4)                           |
| Mo(2)#1–Mo(1)–I(2)    | 121.18(5)                          |
| Mo(2)–Mo(1)–I(2)      | 61.12(3)                           |
| Mo(2)#1–Mo(1)–I(3)#1  | 61.74(4)                           |
| Mo(2)–Mo(1)–I(3)#1    | 120.39(5)                          |
| Mo(2)#1–Mo(1)–I(4)    | 61.96(4)                           |
| Mo(2)–Mo(1)–I(4)      | 120.98(4)                          |
| Mo(3)–Mo(1)–Mo(2)     | 59.83(4)                           |
| Mo(3)#1–Mo(1)–Mo(2)   | 59.61(4)                           |
| Mo(3)–Mo(1)–Mo(3)#1   | 89.99(5)                           |
| Mo(3)–Mo(1)–I(1)      | 61.64(4)                           |
| Mo(3)#1–Mo(1)–I(1)    | 121.01(5)                          |
| Mo(3)–Mo(1)–I(2)      | 120.94(5)                          |
| Mo(3)#1–Mo(1)–I(2)    | 61.07(4)                           |
| Mo(3)–Mo(1)–I(3)#1    | 122.01(5)                          |
| Mo(3)#1–Mo(1)–I(3)#1  | 60.80(4)                           |
| Mo(3)–Mo(1)–I(4)      | 61.16(4)                           |
| Mo(3)#1–Mo(1)–I(4)    | 122.09(5)                          |
| I(1)–Mo(1)–I(4)       | 89.66(4)                           |
| I(2)–Mo(1)–I(1)       | 89.33(4)                           |
| I(2)–Mo(1)–I(3)#1     | 89.00(4)                           |
| I(2)–Mo(1)–I(4)       | 176.66(5)                          |
| I(3)#1–Mo(1)–I(1)     | 176.30(5)                          |
| I(3)#1–Mo(1)–I(4)     | 91.83(4)                           |
| O(11)–Mo(1)–Mo(2)#1   | 137.8(2)                           |
| O(11)–Mo(1)–Mo(2)     | 132.4(2)                           |
| O(11)–Mo(1)–Mo(3)     | 134.8(2)                           |
| O(11)–Mo(1)–Mo(3)#1   | 135.1(2)                           |
| O(11)–Mo(1)–I(1)      | 86.1(2)                            |
| O(11)–Mo(1)–I(2)      | 86.7(2)                            |
| O(11)–Mo(1)–I(3)#1    | 90.5(2)                            |
| O(11)–Mo(1)–I(4)      | 90.1(2)                            |
| Mo(1)#1–Mo(2)–Mo(1)   | 90.13(4)                           |
| Mo(1)#1–Mo(2)–Mo(3)#1 | 60.14(4)                           |
| Mo(1)#1–Mo(2)–Mo(3)   | 60.48(4)                           |
| Mo(1)#1–Mo(2)–I(1)    | 121.95(5)                          |
| Mo(1)–Mo(2)–I(1)      | 61.12(4)                           |
| Mo(1)#1–Mo(2)–I(2)    | 121.34(5)                          |

---

---

|                       |           |
|-----------------------|-----------|
| Mo(1)–Mo(2)–I(2)      | 61.15(3)  |
| Mo(1)#1–Mo(2)–I(3)    | 61.57(4)  |
| Mo(1)–Mo(2)–I(3)      | 120.48(5) |
| Mo(1)#1–Mo(2)–I(4)#1  | 61.65(4)  |
| Mo(1)–Mo(2)–I(4)#1    | 121.03(5) |
| Mo(3)#1–Mo(2)–Mo(1)   | 60.03(4)  |
| Mo(3)–Mo(2)–Mo(1)     | 59.65(4)  |
| Mo(3)#1–Mo(2)–Mo(3)   | 90.13(5)  |
| Mo(3)#1–Mo(2)–I(1)    | 121.12(5) |
| Mo(3)–Mo(2)–I(1)      | 61.47(4)  |
| Mo(3)#1–Mo(2)–I(2)    | 61.21(4)  |
| Mo(3)–Mo(2)–I(2)      | 120.79(5) |
| Mo(3)#1–Mo(2)–I(3)    | 121.71(5) |
| Mo(3)–Mo(2)–I(3)      | 60.85(3)  |
| Mo(3)#1–Mo(2)–I(4)#1  | 61.02(4)  |
| Mo(3)–Mo(2)–I(4)#1    | 122.12(5) |
| I(1)–Mo(2)–I(4)#1     | 176.27(5) |
| I(2)–Mo(2)–I(1)       | 89.18(4)  |
| I(2)–Mo(2)–I(3)       | 177.00(5) |
| I(2)–Mo(2)–I(4)#1     | 89.47(4)  |
| I(3)–Mo(2)–I(1)       | 89.63(4)  |
| I(3)–Mo(2)–I(4)#1     | 91.55(4)  |
| O(21)–Mo(2)–Mo(1)#1   | 129.6(2)  |
| O(21)–Mo(2)–Mo(1)     | 140.2(2)  |
| O(21)–Mo(2)–Mo(3)#1   | 134.7(3)  |
| O(21)–Mo(2)–Mo(3)     | 134.7(2)  |
| O(21)–Mo(2)–I(1)      | 91.9(3)   |
| O(21)–Mo(2)–I(2)      | 92.2(2)   |
| O(21)–Mo(2)–I(3)      | 85.0(2)   |
| O(21)–Mo(2)–I(4)#1    | 84.7(3)   |
| Mo(1)–Mo(3)–Mo(1)#1   | 90.01(5)  |
| Mo(1)–Mo(3)–Mo(2)#1   | 59.59(4)  |
| Mo(1)–Mo(3)–Mo(2)     | 60.51(4)  |
| Mo(1)–Mo(3)–I(1)      | 61.41(4)  |
| Mo(1)#1–Mo(3)–I(1)    | 120.95(5) |
| Mo(1)–Mo(3)–I(2)#1    | 121.04(5) |
| Mo(1)#1–Mo(3)–I(2)#1  | 61.34(4)  |
| Mo(1)–Mo(3)–I(3)      | 122.28(5) |
| Mo(1)#1–Mo(3)–I(3)    | 61.55(4)  |
| Mo(1)–Mo(3)–I(4)      | 61.82(4)  |
| Mo(1)#1–Mo(3)–I(4)    | 122.32(5) |
| Mo(2)#1–Mo(3)–Mo(1)#1 | 60.36(4)  |
| Mo(2)–Mo(3)–Mo(1)#1   | 59.40(4)  |
| Mo(2)#1–Mo(3)–Mo(2)   | 89.88(5)  |
| Mo(2)#1–Mo(3)–I(1)    | 121.00(4) |
| Mo(2)–Mo(3)–I(1)      | 61.55(4)  |
| Mo(2)#1–Mo(3)–I(2)#1  | 61.45(3)  |
| Mo(2)–Mo(3)–I(2)#1    | 120.73(5) |

---

## FULL PAPER

---

|                     |           |
|---------------------|-----------|
| Mo(2)#1–Mo(3)–I(3)  | 121.88(5) |
| Mo(2)–Mo(3)–I(3)    | 61.78(3)  |
| Mo(2)#1–Mo(3)–I(4)  | 61.99(4)  |
| Mo(2)–Mo(3)–I(4)    | 122.31(4) |
| I(2)#1–Mo(3)–I(1)   | 177.09(6) |
| I(2)#1–Mo(3)–I(4)   | 90.13(4)  |
| I(3)–Mo(3)–I(1)     | 90.18(4)  |
| I(3)–Mo(3)–I(2)#1   | 89.56(4)  |
| I(3)–Mo(3)–I(4)     | 175.13(5) |
| I(4)–Mo(3)–I(1)     | 89.89(4)  |
| O(31)–Mo(3)–Mo(1)   | 133.7(2)  |
| O(31)–Mo(3)–Mo(1)#1 | 136.0(2)  |
| O(31)–Mo(3)–Mo(2)#1 | 139.1(2)  |
| O(31)–Mo(3)–Mo(2)   | 131.0(2)  |
| O(31)–Mo(3)–I(1)    | 84.8(2)   |
| O(31)–Mo(3)–I(2)#1  | 92.3(2)   |
| O(31)–Mo(3)–I(3)    | 85.6(2)   |
| O(31)–Mo(3)–I(4)    | 89.5(2)   |
| Mo(1)–I(1)–Mo(2)    | 57.46(4)  |
| Mo(1)–I(1)–Mo(3)    | 56.95(3)  |
| Mo(3)–I(1)–Mo(2)    | 56.97(3)  |
| Mo(2)–I(2)–Mo(1)    | 57.73(3)  |
| Mo(3)#1–I(2)–Mo(1)  | 57.59(4)  |
| Mo(3)#1–I(2)–Mo(2)  | 57.34(3)  |
| Mo(1)#1–I(3)–Mo(2)  | 56.69(3)  |
| Mo(3)–I(3)–Mo(1)#1  | 57.65(4)  |
| Mo(3)–I(3)–Mo(2)    | 57.37(3)  |
| Mo(1)–I(4)–Mo(2)#1  | 56.39(3)  |
| Mo(3)–I(4)–Mo(1)    | 57.02(3)  |
| Mo(3)–I(4)–Mo(2)#1  | 57.00(4)  |
| C(11)–O(11)–Mo(1)   | 137.3(8)  |
| C(21)–O(21)–Mo(2)   | 166.1(8)  |
| C(31)–O(31)–Mo(3)   | 146.7(9)  |
| O(12)–N(11)–C(14)   | 117.7(11) |
| O(13)–N(11)–O(12)   | 124.7(11) |
| O(13)–N(11)–C(14)   | 117.6(11) |
| O(14A)–N(12)–O(15B) | 108(2)    |
| O(14A)–N(12)–C(12)  | 117.1(13) |
| O(15A)–N(12)–O(14A) | 122.3(15) |
| O(15A)–N(12)–O(14B) | 111.2(16) |
| O(15A)–N(12)–O(15B) | 43.5(14)  |
| O(15A)–N(12)–C(12)  | 120.3(12) |
| O(14B)–N(12)–O(14A) | 30.4(14)  |
| O(14B)–N(12)–O(15B) | 121(2)    |
| O(14B)–N(12)–C(12)  | 116.8(15) |
| O(15B)–N(12)–C(12)  | 120.8(16) |
| O(22)–N(21)–C(24)   | 118.1(12) |
| O(23)–N(21)–O(22)   | 123.6(12) |

---

## FULL PAPER

---

|                    |           |
|--------------------|-----------|
| O(23)–N(21)–C(24)  | 118.3(11) |
| O(24)–N(22)–C(22)  | 117.0(11) |
| O(25)–N(22)–O(24)  | 123.2(12) |
| O(25)–N(22)–C(22)  | 119.7(12) |
| O(32)–N(31)–O(33)  | 122.7(12) |
| O(32)–N(31)–C(34)  | 119.3(13) |
| O(33)–N(31)–C(34)  | 117.9(13) |
| O(34)–N(32)–C(32)  | 117.4(11) |
| O(35)–N(32)–O(34)  | 123.8(12) |
| O(35)–N(32)–C(32)  | 118.7(12) |
| O(11)–C(11)–C(12)  | 122.8(11) |
| O(11)–C(11)–C(16)  | 120.4(11) |
| C(12)–C(11)–C(16)  | 116.8(11) |
| C(11)–C(12)–N(12)  | 121.2(11) |
| C(13)–C(12)–N(12)  | 117.1(11) |
| C(13)–C(12)–C(11)  | 121.7(11) |
| C(12)–C(13)–C(14)  | 119.8(12) |
| C(13)–C(14)–N(11)  | 119.3(11) |
| C(15)–C(14)–N(11)  | 120.4(12) |
| C(15)–C(14)–C(13)  | 119.9(11) |
| C(14)–C(15)–C(16)  | 120.7(13) |
| C(15)–C(16)–C(11)  | 120.8(12) |
| O(21)–C(21)–C(22)  | 123.4(12) |
| O(21)–C(21)–C(26)  | 121.9(11) |
| C(26)–C(21)–C(22)  | 114.7(10) |
| C(21)–C(22)–N(22)  | 120.6(11) |
| C(23)–C(22)–N(22)  | 116.6(11) |
| C(23)–C(22)–C(21)  | 122.7(12) |
| C(22)–C(23)–C(24)  | 119.1(12) |
| C(23)–C(24)–N(21)  | 119.1(11) |
| C(23)–C(24)–C(25)  | 120.2(11) |
| C(25)–C(24)–N(21)  | 120.6(12) |
| C(26)–C(25)–C(24)  | 120.5(12) |
| C(25)–C(26)–C(21)  | 122.6(12) |
| O(31)–C(31)–C(32)  | 121.9(12) |
| O(31)–C(31)–C(36)  | 123.9(12) |
| C(36)–C(31)–C(32)  | 114.0(12) |
| C(31)–C(32)–N(32)  | 118.9(11) |
| C(33)–C(32)–N(32)  | 118.5(12) |
| C(33)–C(32)–C(31)  | 122.6(12) |
| C(34)–C(33)–C(32)  | 119.4(12) |
| C(33)–C(34)–N(31)  | 118.1(13) |
| C(33)–C(34)–C(35)  | 121.5(12) |
| C(35)–C(34)–N(31)  | 120.4(12) |
| C(36)–C(35)–C(34)  | 118.8(13) |
| C(35)–C(36)–C(31)  | 123.6(13) |
| C(111)–N(1)–C(121) | 110.7(10) |
| C(111)–N(1)–C(131) | 105.7(11) |

---

---

|                      |           |
|----------------------|-----------|
| C(111)–N(1)–C(141)   | 112.0(11) |
| C(131)–N(1)–C(121)   | 110.3(10) |
| C(131)–N(1)–C(141)   | 110.7(10) |
| C(141)–N(1)–C(121)   | 107.5(11) |
| N(1)–C(111)–C(112)   | 115.8(12) |
| C(111)–C(112)–C(113) | 110.9(13) |
| C(114)–C(113)–C(112) | 112.0(14) |
| C(122)–C(121)–N(1)   | 114.7(11) |
| C(121)–C(122)–C(123) | 110.2(12) |
| C(124)–C(123)–C(122) | 109.5(12) |
| N(1)–C(131)–C(132)   | 115.6(11) |
| C(133)–C(132)–C(131) | 109.1(11) |
| C(134)–C(133)–C(132) | 113.6(13) |
| C(142)–C(141)–N(1)   | 115.2(13) |
| C(143)–C(142)–C(141) | 114.1(14) |
| C(142)–C(143)–C(144) | 113.6(14) |
| C(4S)–O(1S)–C(1S)    | 106.5(16) |
| O(1S)–C(1S)–C(2SA)   | 109(3)    |
| C(2SB)–C(1S)–O(1S)   | 104(2)    |
| C(2SB)–C(1S)–C(2SA)  | 36(3)     |
| C(3S)–C(2SA)–C(1S)   | 102(4)    |
| C(1S)–C(2SB)–C(3S)   | 100(3)    |
| C(2SA)–C(3S)–C(2SB)  | 33(2)     |
| C(4S)–C(3S)–C(2SA)   | 108(3)    |
| C(4S)–C(3S)–C(2SB)   | 103(2)    |
| C(3S)–C(4S)–O(1S)    | 107.7(18) |
| C(8S)–O(2S)–C(5S)    | 105(3)    |
| O(2S)–C(5S)–C(6S)    | 109(3)    |
| C(7S)–C(6S)–C(5S)    | 100(3)    |
| C(6S)–C(7S)–C(8S)    | 110(4)    |
| O(2S)–C(8S)–C(7S)    | 105(3)    |

---

Symmetry transformations used to generate equivalent atoms:

#1  $-x+1/2, -y + 3/2, -z$

---
